# Supplementary material
Source: PubMed Central journal article supplement (PMC9556263)
Supplement: NIHMS1834474-supplement-1.pdf [file NIHMS1834474-supplement-1.pdf]

Supplemental Table 1: Demographic and Disease Characteristics of elderly patients with HPV+ and HPV- OPSCC

| Variable                                         | HPV+ (n=62) | HPV- (n=26) | All Patients (n =88) | p-value <sup>a</sup> |
|--------------------------------------------------|-------------|-------------|----------------------|----------------------|
| Pack years                                       |             |             |                      | 0.71                 |
| Median (IQR)                                     | 35 (11-50)  | 30 (13-45)  | 31 (10-49)           |                      |
| Smoking quit years                               |             |             |                      | 0.21                 |
| Median (IQR)                                     | 26 (14-39)  | 19 (13-26)  | 25 (13-35)           |                      |
| Tumor Stage (AJCC 8th edition), n (%)            |             |             |                      | 0.001                |
| T1                                               | 8 (13)      | 14 (54)     | 22 (25)              |                      |
| T2                                               | 28 (45)     | 7 (27)      | 35 (40)              |                      |
| T3                                               | 15 (24)     | 2 (8)       | 17 (19)              |                      |
| T4                                               | 11 (18)     | 3 (12)      | 14 (16)              |                      |
| Lymph node involvement (AJCC 8th edition), n (%) |             |             |                      | <.001                |
| N0                                               | 5 (8)       | 10 (38)     | 15 (17)              |                      |
| N1                                               | 16 (26)     | 10 (38)     | 26 (30)              |                      |
| N2                                               | 32 (52)     | 4 (15)      | 36 (41)              |                      |
| N3                                               | 9 (15)      | 2 (8)       | 11 (13)              |                      |
| Stage (AJCC 7th edition), n (%)                  |             |             |                      | 0.46                 |
| I                                                | 6 (10)      | 0 (0)       | 6 (7)                |                      |
| II                                               | 1 (2)       | 4 (15)      | 5 (6)                |                      |
| III                                              | 10 (16)     | 3 (12)      | 13 (15)              |                      |
| IVA                                              | 40 (65)     | 14 (54)     | 54 (61)              |                      |
| IVB                                              | 5 (8)       | 5 (19)      | 10 (11)              |                      |
| HPV test(s) performed, n (%)                     |             |             |                      | <.001                |
| p16                                              | 8 (13)      | 20 (80)     | 28 (32)              |                      |
| p16 and ISH                                      | 12 (19)     | 4 (15)      | 16 (18)              |                      |
| DNA PCR confirmation                             | 42 (68)     | 2 (8)       | 44 (50)              |                      |

<sup>a</sup>; p-values relate to HPV+ versus HPV-
