# Supplementary material
Source: PubMed Central journal article supplement (PMC9556263)
Supplement: NIHMS1834474-supplement-2.pdf [file NIHMS1834474-supplement-2.pdf]

Supplemental Table 2: Pathological characteristics of HPV+ and HPV- elderly patients with OPSCC who received surgical intervention

| Pathological Variable          | HPV+ (n=27) | HPV- (n=4) | All Patients (n =31) | p-value <sup>a</sup> |
|--------------------------------|-------------|------------|----------------------|----------------------|
| #Resected nodes                |             |            |                      | 0.7                  |
| Median (range)                 | 25 (21-34)  | 29 (20-50) | 25 (21-35)           |                      |
| #Positive nodes                |             |            |                      | 0.4                  |
| Median (range)                 | 1 (1-3)     | 1 (1-2)    | 1 (1-3)              |                      |
| Perineural invasion, n (%)     |             |            |                      | 0.5                  |
| No                             | 23 (85)     | 3 (75)     | 26 (81)              |                      |
| Yes                            | 4 (15)      | 1 (25)     | 5 (16)               |                      |
| Extracapsular extension, n (%) |             |            |                      | 0.6                  |
| No                             | 21 (78)     | 4 (100)    | 25 (78)              |                      |
| Yes                            | 6 (22)      | 0 (0)      | 6 (19)               |                      |
| Lymphovascular invasion, n (%) |             |            |                      | 0.3                  |
| No                             | 21 (78)     | 2 (50)     | 23 (72)              |                      |
| Yes                            | 6 (22)      | 2 (50)     | 8 (25)               |                      |
| Final Surgical margins, n (%)  |             |            |                      | 0.06                 |
| Negative                       | 21 (78)     | 1 (25)     | 22 (69)              |                      |
| Positive                       | 6 (22)      | 3 (75)     | 9 (28)               |                      |

<sup>a</sup>; p-values relate to HPV+ versus HPV-
