# Supplementary material
Source: PubMed Central journal article supplement (PMC9556263)
Supplement: NIHMS1834474-supplement-3.pdf [file NIHMS1834474-supplement-3.pdf]

Supplemental Table 3: Multivariate Cox proportional hazards models incorporating clinical covariates in initial model determination

| Variable               | Overall Survival <sup>a</sup> |            |         | Disease Specific Survival <sup>a</sup> |            |         | Locoregional Control <sup>a</sup> |            |         |
|------------------------|-------------------------------|------------|---------|----------------------------------------|------------|---------|-----------------------------------|------------|---------|
|                        | Hazard Ratio                  | 95% CI     | P-value | Hazard Ratio                           | 95% CI     | P-value | Hazard Ratio                      | 95% CI     | P-value |
| <b>HPV Status</b>      |                               |            |         |                                        |            |         |                                   |            |         |
| HPV-                   | <i>Ref</i>                    |            |         | <i>Ref</i>                             |            |         | <i>Ref</i>                        |            |         |
| HPV+                   | 0.23                          | 0.094-0.56 | 0.002   | 0.22                                   | 0.072-0.67 | 0.008   | 0.26                              | 0.082-0.82 | 0.013   |
| <b>Age<sup>b</sup></b> |                               |            |         |                                        |            |         |                                   |            |         |
| 70-80                  | <i>Ref</i>                    |            |         |                                        |            |         |                                   |            |         |
| ≥80                    | 2.88                          | 1.01-8.18  | 0.038   |                                        |            |         |                                   |            |         |

<sup>a</sup>; Parameters entered in multivariable model included age, race, gender, alcohol use, smoking history, CCI, and ECOG

<sup>b</sup>; Age did not meet criteria for inclusion in multivariate DSS or LRC model
