# Supplementary material
Source: PubMed Central journal article supplement (PMC9556263)
Supplement: NIHMS1834474-supplement-4.pdf [file NIHMS1834474-supplement-4.pdf]

Supplemental Table 4: Multivariate Cox proportional hazards models incorporating all clinical covariates and Stage in initial model determination

| Variable               | Overall Survival <sup>a</sup> |           |         | Disease Specific Survival <sup>a</sup> |           |         |
|------------------------|-------------------------------|-----------|---------|----------------------------------------|-----------|---------|
|                        | Hazard Ratio                  | 95% CI    | P-value | Hazard Ratio                           | 95% CI    | P-value |
| <b>Stage</b>           |                               |           |         |                                        |           |         |
| I/II                   | <i>Ref</i>                    |           |         | <i>Ref</i>                             |           |         |
| III/IVA                | 2.55                          | 1.06-6.13 | 0.036   | 3.19                                   | 1.02-9.94 | 0.046   |
| <b>Age<sup>b</sup></b> |                               |           |         |                                        |           |         |
| 70-80                  | <i>Ref</i>                    |           |         |                                        |           |         |
| ≥80                    | 2.38                          | 0.85-6.64 | 0.098   |                                        |           |         |
| <b>CCI<sup>c</sup></b> |                               |           |         |                                        |           |         |
| 5/6                    |                               |           |         | <i>Ref</i>                             |           |         |
| ≥7                     |                               |           |         | 2.02                                   | 0.65-6.34 | 0.098   |

<sup>a</sup>; Parameters entered in multivariable model included age, race, gender, alcohol use, smoking history, CCI, and ECOG

<sup>b</sup>; Age did not meet criteria for inclusion in multivariate DSS model;

<sup>c</sup>; CCI did not meet criteria for inclusion in multivariate DSS model
